# Supplementary material
Source: PubMed Central journal article supplement (PMC4473729)
Supplement: es5b01254_si_001.pdf [file es5b01254_si_001.pdf]

1  
2  
3  
4  
5  
6  
7  
8  
9  
10  
11  
12  
13  
14  
15  
16  
17  
18  
19  
20  
21  
22  
23  
24  
25  
26  
27

*Supporting Information for:*

# **A Modular Advanced Oxidation Process Enabled by Cathodic Hydrogen Peroxide Production**

James M. Barazesh,<sup>#</sup> Tom Hennebel,<sup>#</sup> Justin T. Jasper and David L. Sedlak<sup>\*</sup>

Department of Civil and Environmental Engineering, 407 O'Brien Hall, University of  
California, Berkeley, CA 94720-1716, USA

<sup>#</sup> - These authors contributed equally

*19 pages*  
*7 tables*  
*12 figures*

<sup>\*</sup>Corresponding author: [sedlak@berkeley.edu](mailto:sedlak@berkeley.edu), T: 510-643-0256, F: 202-354-4914

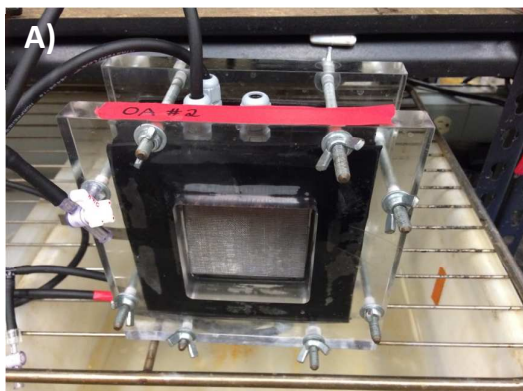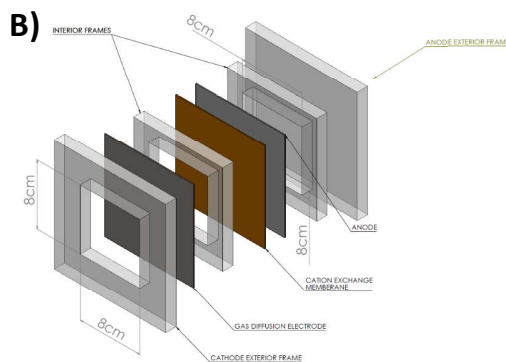

28

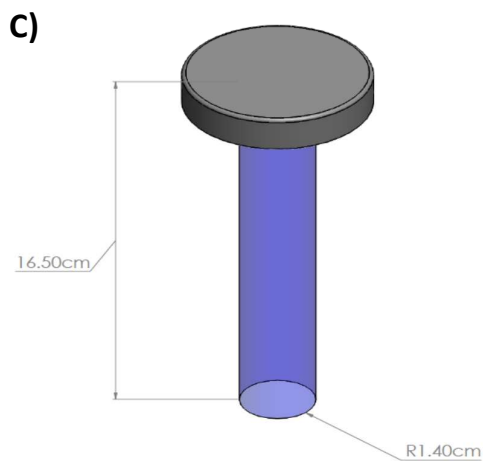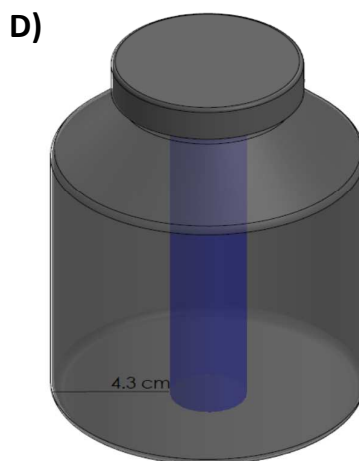

29

30 **Figure S1:** (a) Photo of the electrochemical cell, (b) blown up schematic of the cell  
 31 components, (c) Low pressure UV lamp (G23 Odyssey Pool Lamp, 9W, electrical efficiency =  
 32 27%), (d) UV reactor.

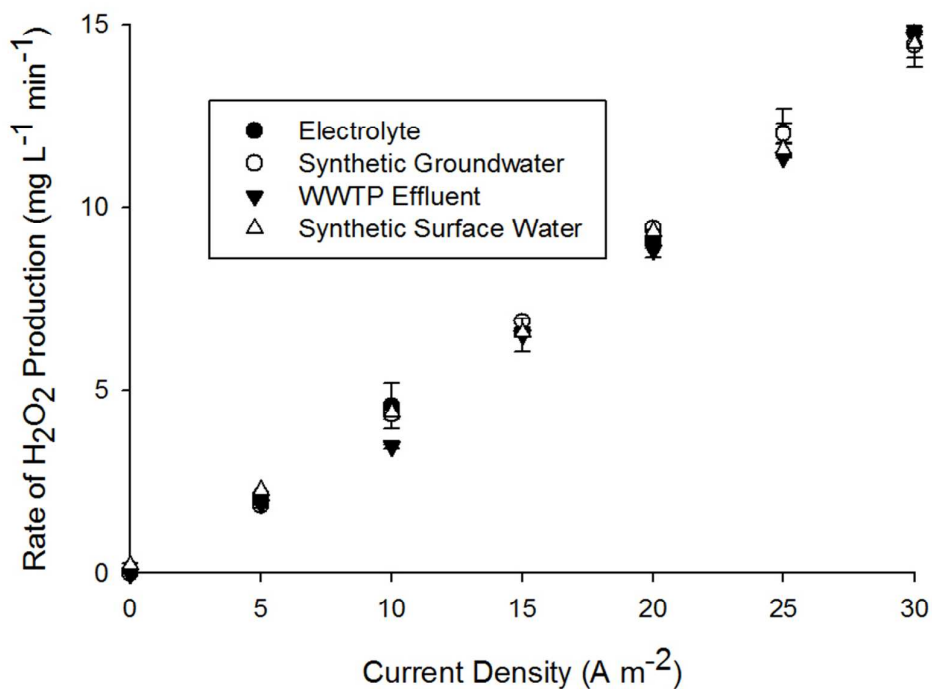

33

34 **Figure S2:** Hydrogen peroxide production rate as a function of current density (WWTP:  
35 wastewater treatment plant).

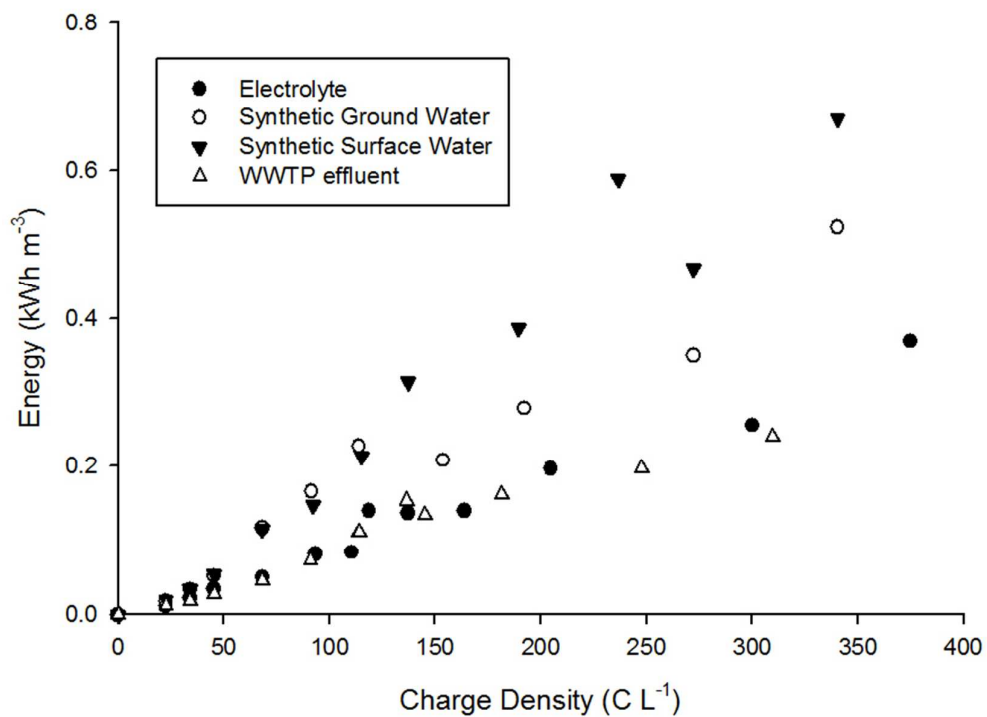

36

37 **Figure S3:** Energy demand of the electrochemical cell per m<sup>3</sup> of treated water as a function of  
38 applied charge density (WWTP: wastewater treatment plant).

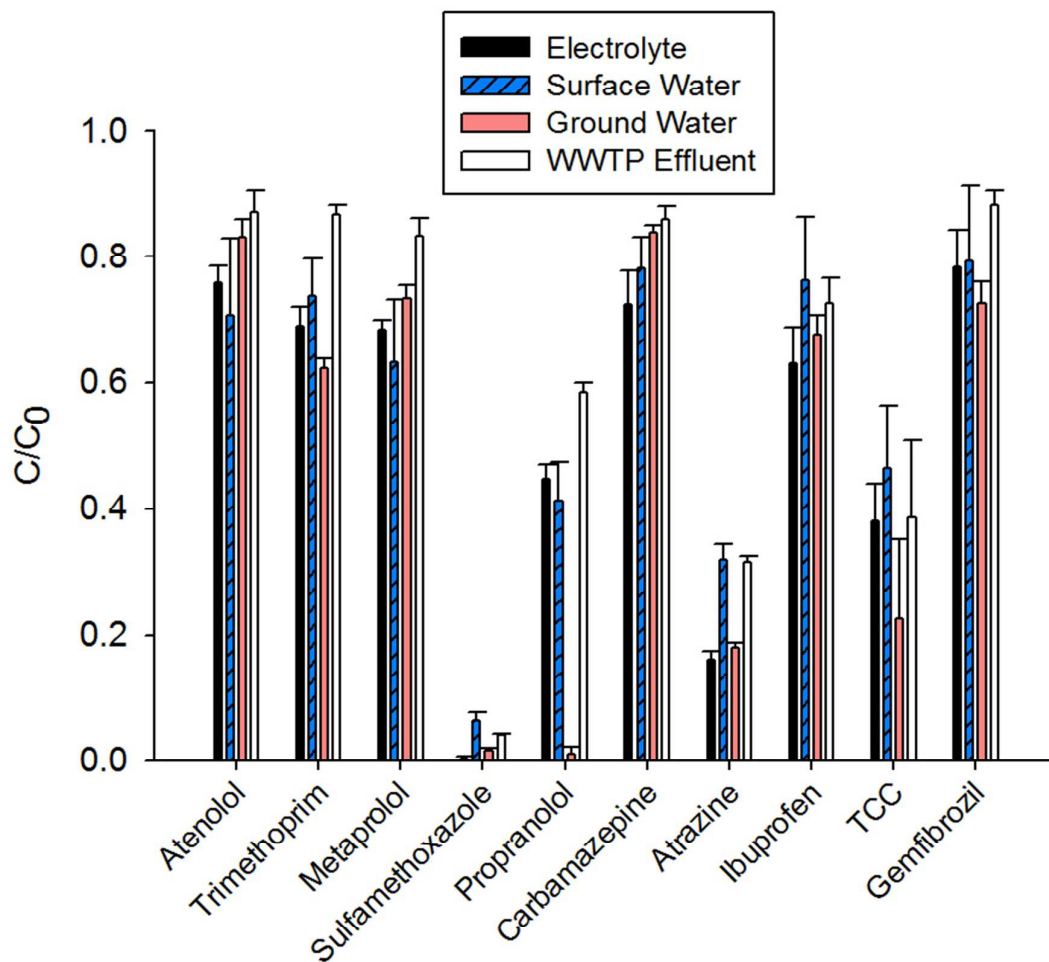

39

40 **Figure S4:** Normalized removal of organic contaminants by UV photolysis (no H<sub>2</sub>O<sub>2</sub> present)  
 41 (WWTP: wastewater treatment plant).

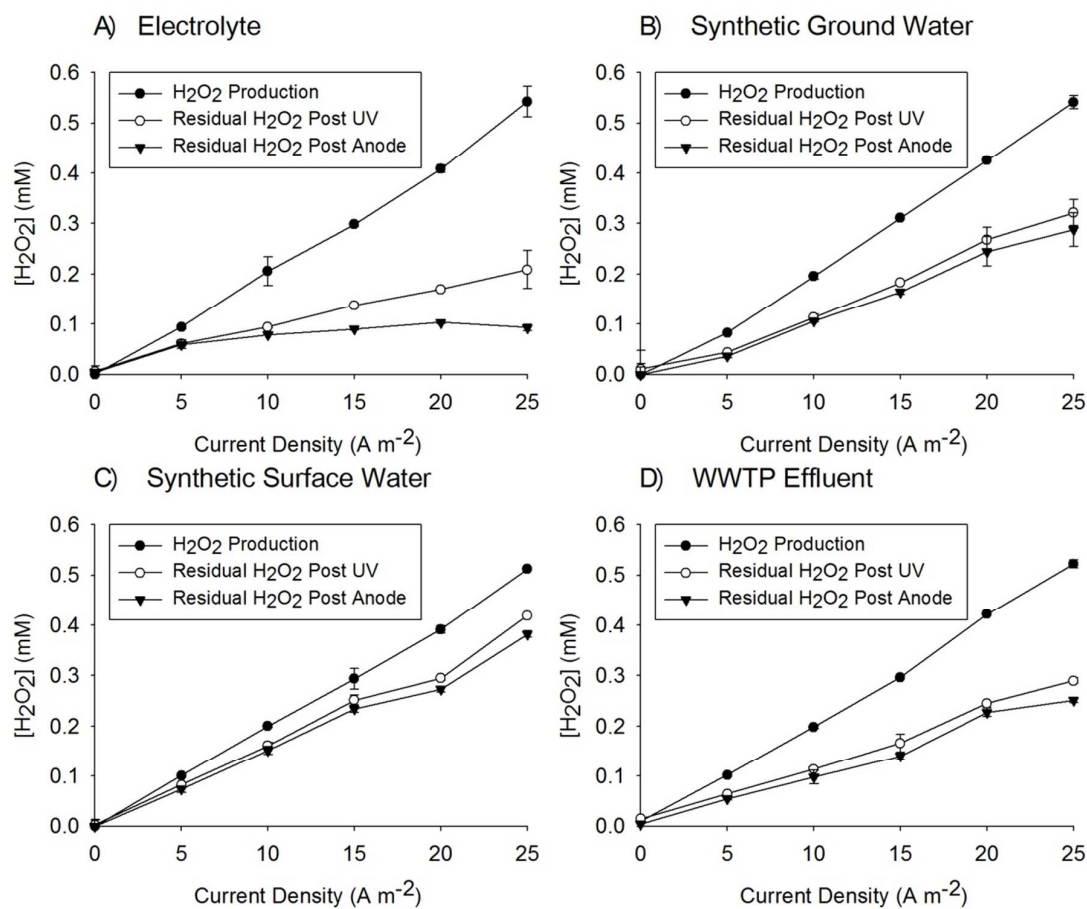

42

43

44 **Figure S5:** Production of H<sub>2</sub>O<sub>2</sub> in the cathode, residual H<sub>2</sub>O<sub>2</sub> after the UV cell and residual  
 45 H<sub>2</sub>O<sub>2</sub> after the anode for the four types of source waters at applied current densities from 0 to  
 46 25 A m<sup>-2</sup> (WWTP: wastewater treatment plant).

47

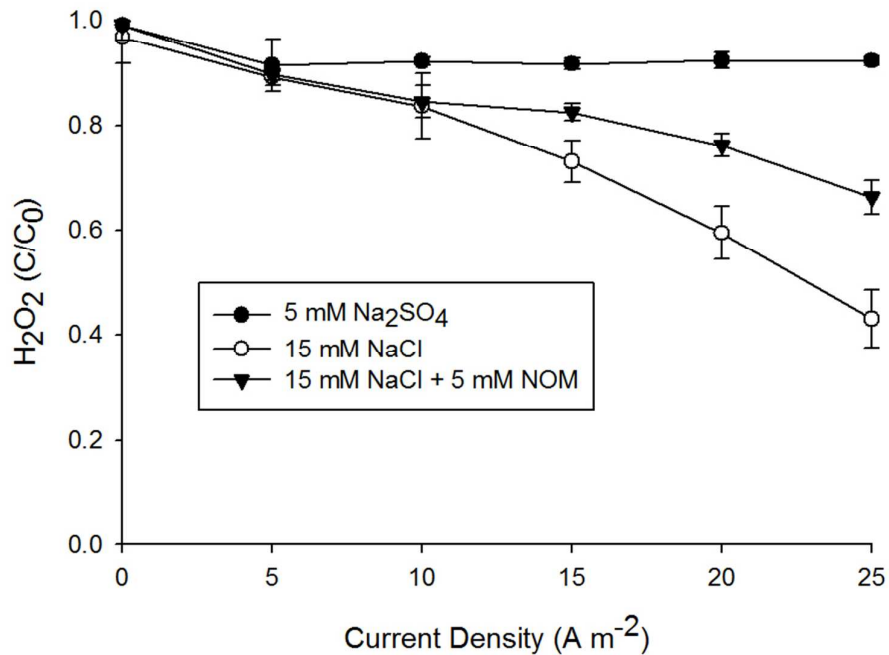

48

49 **Figure S6:** Normalized H<sub>2</sub>O<sub>2</sub> removal in the anode as a function of current density in the  
 50 presence and absence of chloride or natural organic matter (HRT = 1.5 min, [H<sub>2</sub>O<sub>2</sub>]<sub>0</sub> = 10 mg  
 51 L<sup>-1</sup> (0.294mM)) (WWTP: wastewater treatment plant).

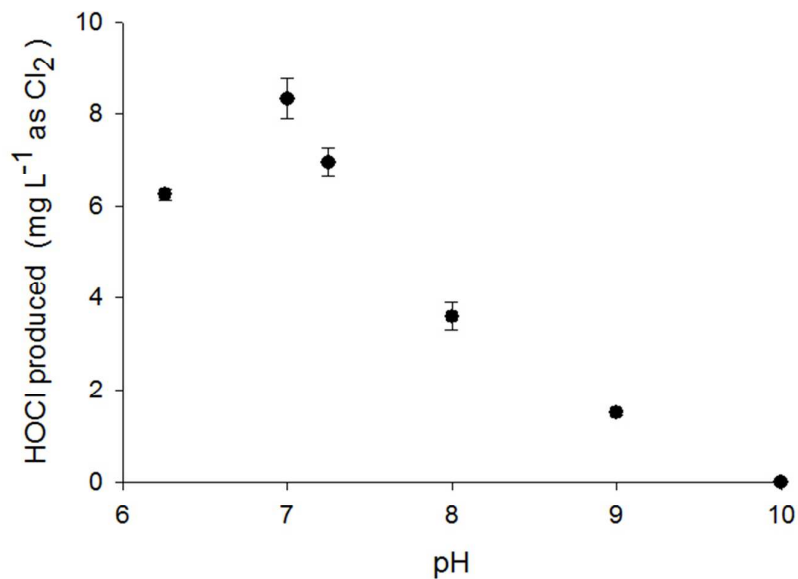

52

53 **Figure S7:** HOCl produced as a function of anodic pH at an applied current density of 25 A  
 54 m<sup>-2</sup> ([Cl<sup>-</sup>]<sub>0</sub> = 10 mM). pH was buffered using 20 mM carbonate buffer (6) and borate buffer  
 55 (7-10) (WWTP: wastewater treatment plant).

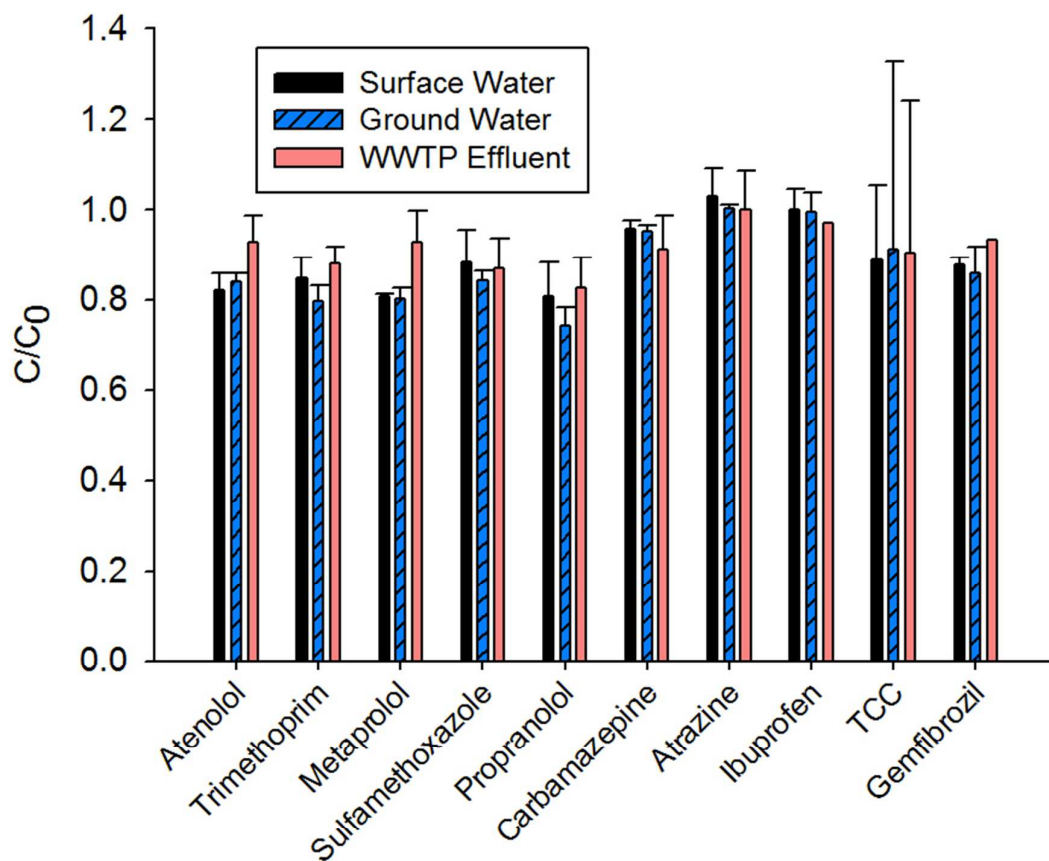

56

57 **Figure S8:** Direct oxidation of trace organic contaminants at  $25 \text{ A m}^{-2}$  for the 3 representative  
 58 source waters (HRT = 1.5 min,  $[\text{H}_2\text{O}_2]_0 = 10 \text{ mg L}^{-1}$  (0.294mM)). In the presence of  $\text{H}_2\text{O}_2$  all  
 59  $\text{HOCl}/\text{OCl}^-$  is scavenged and removal of the trace organic contaminants is due to direct anodic  
 60 oxidation (WWTP: wastewater treatment plant).

61

62

63

64

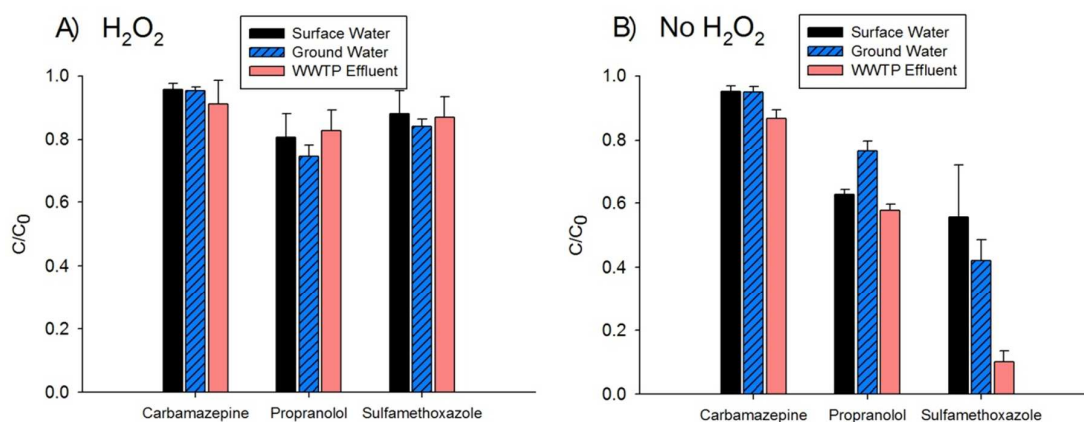

65

66 **Figure S9:** Anodic removal of carbamazepine, propranolol, and sulfamethoxazole in (a) the  
 67 presence of  $H_2O_2$  (10 mg L<sup>-1</sup>, chlorine scavenged) and in (b) the absence of  $H_2O_2$  (no chlorine  
 68 scavenged) at 25 A m<sup>-2</sup> (HRT = 1.5 min). In the presence of  $H_2O_2$ , removal of the trace  
 69 organic contaminants was due to direct anodic oxidation. In the absence of  $H_2O_2$ , removal was  
 70 due to a combination of direct oxidation and reaction with chlorine. The three compounds  
 71 were selected because they exhibit varying reactivities with chlorine ( $k_{HOCl, carbamazepine} <$   
 72  $k_{HOCl, propranolol} < k_{HOCl, sulfamethoxazole}$ ; see Table S3) (WWTP: wastewater treatment plant).

73

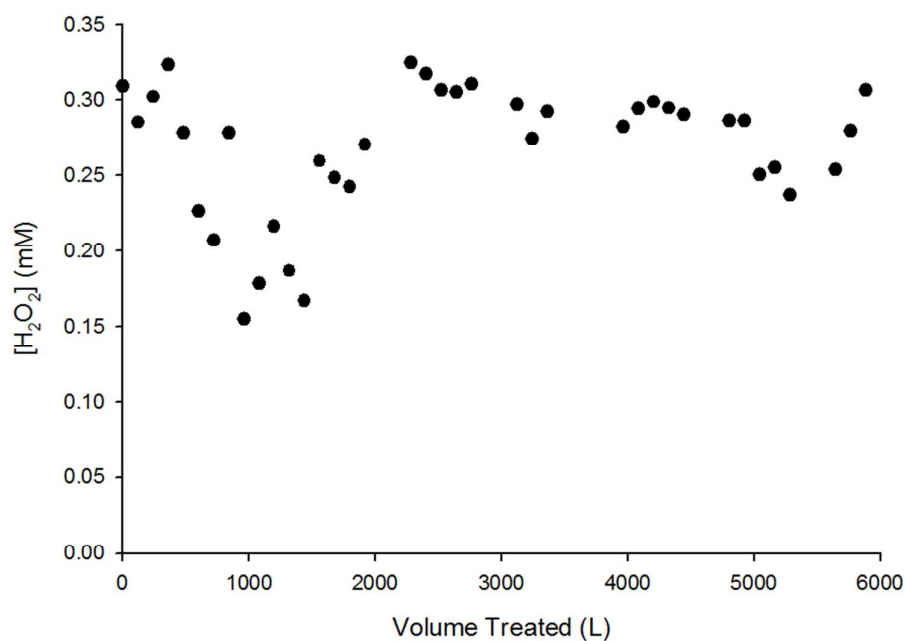

74

75 **Figure S10:** Measured long term cathode performance at 15 A m<sup>-2</sup> (Catholyte/Anolyte = Tap  
 76 water + 5mM  $Na_2SO_4$ , alkalinity = 0.34 mM,  $[Ca^{2+}] = 0.2$  mM,  $Q = 120$  L d<sup>-1</sup>). Predicted  
 77  $H_2O_2$  production was 0.29 mM (WWTP: wastewater treatment plant).

78



79 **Determination of the photon fluence rate,  $W_{254}$ .**

80 Photon fluence rates at 254 nm were determined using 10  $\mu\text{M}$  atrazine as an actinometer at pH  
 81 8<sup>1</sup>. The following constants were employed:  $\epsilon_{254}=3860 \text{ M}^{-1} \text{ cm}^{-1}$ ,  $\phi_{254}= 0.046 \text{ mol Ei}^{-1}$ . The  
 82 fluence was calculated from the near surface specific rate of light absorbance for an organic  
 83 pollutant at a single wavelength:

$$\frac{-d[C]}{dt} = \frac{E_{254}^{\circ} \epsilon_{254} \phi_{254} [1 - 10^{-\alpha z}]}{\alpha z} [C]$$

84 where  $E_{254}^{\circ}$  is the incident photon fluence rate ( $\text{Ei m}^{-2} \text{ s}^{-1}$ ) at 254 nm,  $\epsilon_{254}$  is the decadic molar  
 85 extinction coefficient at 254 nm ( $\text{M}^{-1} \text{ cm}^{-1}$ ),  $\phi_{254}$  is the quantum yield at 254 nm ( $\text{mol Ei}^{-1}$ ),  $\alpha$  is  
 86 the solution absorbance ( $\text{cm}^{-1}$ ), and  $z$  is the light path length (cm). Because the experiments  
 87 were performed in Milli-Q water, we can assume very little light absorbance (i.e.,  $\alpha * z < 0.02$ )  
 88 and the following approximation can be made:

$$1 - 10^{-\alpha z} \cong 2.3\alpha z$$

89 Therefore, the expression for the near surface specific rate of light absorbance simplifies to

$$\frac{-d[C]}{dt} = 2.303 E_{254}^{\circ} \epsilon_{254} \phi_{254} [C]$$

$$\ln\left(\frac{C}{C_0}\right) = 2.303 E_{254}^{\circ} \epsilon_{254} \phi_{254} t$$

90 By plotting the natural logarithm of the contaminant removal with time we can obtain an  
 91 estimate of the incident photon fluence,  $E_{254}^{\circ}$ :

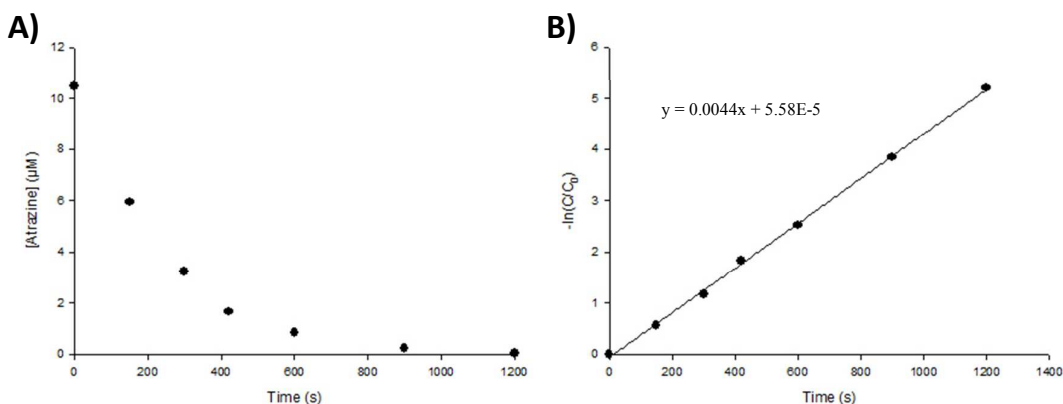

92 **Figure S11:** (a) UV photolysis of atrazine versus time and the (b) natural logarithm of  
 93

94 normalized atrazine concentration versus time. The solution contained 10  $\mu\text{M}$  atrazine at pH  
 95 8.

$$E_{254}^{\circ} = \frac{k}{2.303\epsilon_{254}\phi_{254}}$$

$$E_{254}^{\circ} = 106.8 \mu\text{Ei m}^2 \text{ s}^{-1}$$

## 96 **Calculations for the half life of $\text{H}_2\text{O}_2$ and NOM with HOCl**

97 In accordance with Zhai et al. (2014), the reaction between HOCl with NOM depends on the  
 98 number of reactive sites on the NOM, with certain moieties having greater electron donating  
 99 capacity and therefore higher rates of reaction with HOCl (e.g., phenolic groups). Fast  
 100 reaction sites are defined as  $\text{NOM}_{\text{fast}}$ , slow reaction sites are defined as  $\text{NOM}_{\text{slow}}$ , and sites that  
 101 do not produce halogenated byproducts are defined as  $\text{NOM}_{\text{dec}}$ . Using data for SWHA, fast  
 102 sites comprise about 3% of the aromatic carbon, slow sites comprise 35%, and dec sites  
 103 comprise 62%<sup>2</sup>. Assuming a  $[\text{H}_2\text{O}_2] = 0.5 \times 10^{-4} \text{ M}$  ( $\text{H}_2\text{O}_2$  produced at 25  $\text{A m}^{-2}$ ) and  $[\text{NOM}]$   
 104 = 5  $\text{mg C L}^{-1}$  (0.42 mM), we can calculate the half life of  $\text{H}_2\text{O}_2$  given the following rate  
 105 constants:  $k_{\text{H}_2\text{O}_2, \text{HOCl}} = 10^3 \text{ M}^{-1} \text{ s}^{-1}$ ,  $k_{\text{HOCl}, \text{NOM}_{\text{fast}}} = 10^3 \text{ M}^{-1} \text{ s}^{-1}$ ,  $k_{\text{HOCl}, \text{NOM}_{\text{slow}}} = 1$ ,  $k_{\text{HOCl}, \text{NOM}_{\text{dec}}} =$   
 106  $5 \text{ M}^{-1} \text{ s}^{-1}$

$$t_{\frac{1}{2}, \text{H}_2\text{O}_2} = \frac{\ln(2)}{k_{\text{HOCl}, \text{H}_2\text{O}_2} [\text{H}_2\text{O}_2]} = \frac{\ln(2)}{(10^{-3} \text{ M})(0.5 \times 10^{-4} \text{ M}^{-1} \text{ s}^{-1})} = 1.39 \text{ s}$$

$$t_{\frac{1}{2}, \text{H}_2\text{O}_2} = \frac{\ln(2)}{k_{\text{HOCl}, \text{NOM}_{\text{fast}}} [\text{NOM}_{\text{fast}}] + k_{\text{HOCl}, \text{NOM}_{\text{slow}}} [\text{NOM}_{\text{slow}}] + k_{\text{HOCl}, \text{NOM}_{\text{dec}}} [\text{NOM}_{\text{dec}}]}$$

$$= \frac{\ln(2)}{[(0.03)(10^3 \text{ M}^{-1} \text{ s}^{-1}) + (0.35)(1 \text{ M}^{-1} \text{ s}^{-1}) + (0.62)(5 \text{ M}^{-1} \text{ s}^{-1})](4.2 \times 10^{-4} \text{ M})} = 49.3 \text{ s}$$

## 107 **Branching ratio of HOCl with Trace Organics and $\text{H}_2\text{O}_2$**

108 Reaction rate constants of HOCl with the trace organic compounds used in this study ranged  
 109 from  $1.7 \times 10^{-2} \text{ M}^{-1} \text{ s}^{-1}$  (atenolol) to  $6.17 \times 10^2 \text{ M}^{-1} \text{ s}^{-1}$  (sulfamethoxazole) (Table S3). Assuming  
 110 a concentration of trace organics equal to  $10^{-6} \text{ M}$  (10 compounds at  $10 \mu\text{g L}^{-1}$ , average MW =

111 250 g mol<sup>-1</sup>). Using the higher bound on the rate constant with chlorine, the branching ratio of  
 112 HOCl with trace organics in the presence of H<sub>2</sub>O<sub>2</sub> is:

$$\frac{k_{HOCl,organic}[Organic]}{k_{HOCl,H2O2}[H_2O_2]} = \frac{(6.17 \times 10^2 M^{-1} s^{-1})(10^{-6} M)}{(10^{-3} M)(10^{-3} M^{-1} s^{-1})} = 0.0007$$

113 Therefore, virtually all the HOCl reacts with H<sub>2</sub>O<sub>2</sub>.

114 **Determination of bimolecular rate constant for HO• and NOM**

115 In accordance with Appiani et al. (2014), Suwannee River Humic Acids (average molecular  
 116 weight of 300 g mol<sup>-1</sup>, %C = 52.55) have a bimolecular rate constant with HO• of 5.7 × 10<sup>8</sup>  
 117 (M<sub>C</sub><sup>-1</sup> s<sup>-1</sup>) or 5.6 × 10<sup>9</sup> (M<sup>-1</sup> s<sup>-1</sup>)<sup>3</sup>. This equates to a bimolecular rate constant on a per carbon  
 118 basis of 9.8 × 10<sup>3</sup> (L mgC<sup>-1</sup> s<sup>-1</sup>).

119 **Calculation for the fraction of HO• going to contaminants**

$$\text{fraction HO}^\bullet \text{ to contaminants} = \frac{\sum k_{HO^\bullet,cont}[Cont]}{\sum k_{HO^\bullet,s}[S]}$$

120 A sample calculation for the fraction of the HO• to trace organic contaminants in the  
 121 groundwater for pH 8 in the presence of 3 mg L<sup>-1</sup> (0.09 mM) has been provided using the  
 122 bimolecular rate constants in Table 1 and Table S3. At pH 8, of the 3.9 mEq L<sup>-1</sup> of the TIC in  
 123 the ground water, 3.8 mM is at HCO<sub>3</sub><sup>-</sup> while 0.02 mM is as CO<sub>3</sub><sup>2-</sup>.

$$\frac{\sum k_{HO^\bullet,cont}[Cont]}{\sum k_{HO^\bullet,cont}[Cont] + k_{HO^\bullet,H2O2}[H_2O_2] + k_{HO^\bullet,DOC}[DOC] + k_{HO^\bullet,HCO3}[HCO_3^-] + k_{HO^\bullet,CO32-}[CO_3^{2-}]}$$

$$\frac{(2.99E3 s^{-1})}{(2.99E3 s^{-1}) + (2.7E7 M^{-1} s^{-1})(9 \times 10^{-5} M) + (9.8E3 L mgC^{-1} s^{-1})(0.1 mgC L^{-1}) + (8.5E6 M^{-1} s^{-1})(3.8 \times 10^{-3} M) + (3.9E8 M^{-1} s^{-1})(0.02 \times 10^{-5} M)}$$

124 = 6.5% of available HO•

125 **Calculation for the reduction in direct photolysis from H<sub>2</sub>O<sub>2</sub> light screening**

126 The pseudo-first order rate constant for direct photolysis of compounds in the absence of  
 127 H<sub>2</sub>O<sub>2</sub>, k'<sub>d</sub>, is given by:

$$k'_d = \frac{E_{254}^{\circ} \epsilon_{254} \phi_{254} [1 - 10^{-\alpha z}]}{\alpha z}$$

128 where  $E_{254}^{\circ}$  is the incident photon fluence rate ( $\text{Ei m}^{-2} \text{s}^{-1}$ ) at 254 nm,  $\epsilon_{254}$  is the decadic molar  
 129 extinction coefficient of the organic compound at 254 nm ( $\text{M}^{-1} \text{cm}^{-1}$ ),  $\phi_{254}$  is the quantum yield  
 130 at 254 nm ( $\text{mol Ei}^{-1}$ ),  $\alpha$  is the solution absorbance ( $\text{cm}^{-1}$ ), and  $z$  is the light path length (cm). In  
 131 the presence of  $\text{H}_2\text{O}_2$ , the direct photolysis rate decreases due to additional absorbance of  
 132 incident light by  $\text{H}_2\text{O}_2$ . The pseudo-first order rate constant for direct photolysis of  
 133 compounds in the presence of  $\text{H}_2\text{O}_2$ ,  $k'_{d,\text{H}_2\text{O}_2}$ , is given by:

$$k'_{d,\text{H}_2\text{O}_2} = \frac{E_{254}^{\circ} \epsilon_{254} \phi_{254} [1 - 10^{-(\alpha + \epsilon_{\text{H}_2\text{O}_2} [\text{H}_2\text{O}_2]) z}]}{(\alpha + \epsilon_{\text{H}_2\text{O}_2} [\text{H}_2\text{O}_2]) z}$$

134 where  $\epsilon_{\text{H}_2\text{O}_2}$  is the decadic molar extinction coefficient of the  $\text{H}_2\text{O}_2$  at 254 nm ( $\text{M}^{-1} \text{cm}^{-1}$ ).  
 135 Comparing the two rates, we get:

$$\frac{k'_{d,\text{H}_2\text{O}_2} - k'_d}{k'_d} = \frac{\left( \frac{[1 - 10^{-(\alpha + \epsilon_{\text{H}_2\text{O}_2} [\text{H}_2\text{O}_2]) z}] \alpha}{(\alpha + \epsilon_{\text{H}_2\text{O}_2} [\text{H}_2\text{O}_2])} \right) - [1 - 10^{-\alpha z}]}{[1 - 10^{-\alpha z}]}$$

136 For WWTP effluent at 25 A  $\text{m}^{-2}$ :  $\alpha = 0.137 \text{ cm}^{-1}$ ,  $\epsilon_{\text{H}_2\text{O}_2} = 18.6 \text{ M}^{-1} \text{cm}^{-1}$ ,  $[\text{H}_2\text{O}_2] = 0.54 \text{ mM}$ ,  $z$   
 137  $= 0.043 \text{ m}$ . As a result, the direct photolysis rate in the presence of  $\text{H}_2\text{O}_2$  decreased by 3.8%  
 138 for the suite of trace organic contaminants:

$$\frac{k'_{d,\text{H}_2\text{O}_2} - k'_d}{k'_d} = 0.0378$$

### 139 **Electrical Energy per Order ( $E_{\text{EO}}$ ) calculation**

140

141 The following sample calculation is for the  $E_{\text{EO}}$  of carbamazepine in the nitrified wastewater  
 142 effluent at a current density of 25 A  $\text{m}^{-2}$ .

$$E_{\text{EO}} = \frac{P}{Q \log \left( \frac{C_0}{C} \right)}$$

143 where P (kW) is the electrical power for the electrochemical cell and UV lamp, Q (m<sup>3</sup> h<sup>-1</sup>) is  
 144 the system flow rate, and C<sub>0</sub> and C (M) are the initial and final contaminant concentrations.

$$Q = \left(\frac{120 \text{ L}}{\text{d}}\right) \left(\frac{\text{m}^3}{1000\text{L}}\right) \left(\frac{\text{d}}{24\text{h}}\right) = 0.005 \frac{\text{m}^3}{\text{h}}$$

145 The total system power (P<sub>total</sub>, W) is a combination of the UV lamp power and the  
 146 electrochemical cell power, which can be expressed as a product of the current density (I, A  
 147 m<sup>-2</sup>), cell potential (V<sub>cell</sub>), and the electrode surface area (A, m<sup>2</sup>) :

$$P_{\text{total}} = I * A * V_{\text{cell}} + P_{\text{lamp}}$$

$$P_{\text{total}} = \left(\frac{25 \text{ A}}{\text{m}^2}\right) (0.0064 \text{ m}^2)(6.67 \text{ V}) + 9\text{W} = 10.1 \text{ W} = 0.01 \text{ kW}$$

148 At 25 A m<sup>-2</sup>, carbamazepine was transformed from 10.18 ± 0.3 µg L<sup>-1</sup> (4.3 × 10<sup>-8</sup> M) to 0.63 ±  
 149 0.03 µg L<sup>-1</sup> (2.7 × 10<sup>-9</sup> M).

$$E_{\text{EO}} = \frac{0.01 \text{ kW}}{\left(0.005 \frac{\text{m}^3}{\text{h}}\right) \log\left(\frac{4.3 \times 10^{-8} \text{ M}}{2.7 \times 10^{-9} \text{ M}}\right)} = 1.67 \text{ kWh log}^{-1} \text{ m}^{-3}$$

150

151 **Energy and energy per volume treated calculations for the electrochemical cell and UV**  
 152 **lamp**

153 At a current density of 4.14 A m<sup>-2</sup>, the highest cell potential was for the poorly conductive  
 154 groundwater (2.67 V). Assuming the cell runs continuously for a day:

$$\left(\frac{4.14 \text{ A}}{\text{m}^2}\right) (0.0064 \text{ m}^2)(2.67 \text{ V}) = 0.071 \text{ W} = \frac{0.071 \text{ J}}{\text{s}}$$

$$\left(\frac{0.071 \text{ J}}{\text{s}}\right) (86400\text{s}) \left(\frac{\text{Wh}}{3600\text{J}}\right) = 1.7 \text{ Wh}$$

155 The energy per volume of water treated was calculated using the power output of the UV  
 156 lamp (9W) and the flow rate of the system (120 L d<sup>-1</sup>)

$$(0.009 \text{ kW}) \left(\frac{1\text{d}}{120\text{L}}\right) \left(\frac{24\text{h}}{\text{d}}\right) \left(\frac{1000\text{L}}{\text{m}^3}\right) = 1.8 \text{ kWh m}^{-3}$$

157 **pH dependence of H<sub>2</sub>O<sub>2</sub> reaction with HOCl**

158 The primary mechanisms for the reaction of HOCl with H<sub>2</sub>O<sub>2</sub> are:

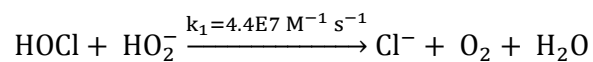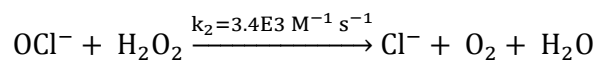

159 The removal of either HOCl<sub>total</sub> or H<sub>2</sub>O<sub>2 total</sub> can be given by

$$\frac{-d[\text{HOCl}_{\text{total}}]}{dt} = (k_1\alpha_{0,\text{HOCl}}\alpha_{1,\text{H}_2\text{O}_2} + k_2\alpha_{1,\text{HOCl}}\alpha_{0,\text{H}_2\text{O}_2})[\text{HOCl}_{\text{total}}][\text{H}_2\text{O}_{2\text{total}}]$$

160 Where the pH dependent bimolecular rate constant is just:

$$k'_{\text{pH}} = (k_1\alpha_{0,\text{HOCl}}\alpha_{1,\text{H}_2\text{O}_2} + k_2\alpha_{1,\text{HOCl}}\alpha_{0,\text{H}_2\text{O}_2})$$

161 Given the pK<sub>a,HOCl</sub> = 7.6 and pK<sub>a,H<sub>2</sub>O<sub>2</sub></sub> = 11.6, we can calculate the alpha speciation values.

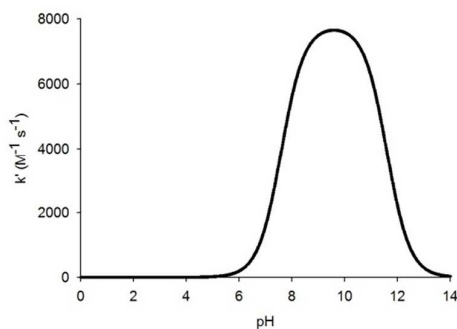

162

163 **Figure S12:** pH-dependent bimolecular rate constant for the reaction between HOCl and  
164 H<sub>2</sub>O<sub>2</sub>.

165

166

167

168

169

170

171

172

173

174 **Table S1.** Composition of the waters

| <b>Cations (mM)</b>               | <b>Electrolyte</b> | <b>Surface Water</b> | <b>Ground Water</b> | <b>WWTP Effluent<sup>b</sup></b> |
|-----------------------------------|--------------------|----------------------|---------------------|----------------------------------|
| Na <sup>+</sup>                   | 12.5               | 1.12                 | 0.0256              | 13.9                             |
| K <sup>+</sup>                    | 0                  | 0.234                | 0.11                | 0.41                             |
| Ca <sup>2+</sup>                  | 0                  | 2.55                 | 0.81                | 1.8                              |
| Mg <sup>2+</sup>                  | 0                  | 0.383                | 0.5                 | 1.68                             |
| <b>Anions (mM)</b>                |                    |                      |                     |                                  |
| NO <sub>3</sub> <sup>-</sup>      | 0                  | 0.234                | 0.11                | 1.63                             |
| SO <sub>4</sub> <sup>2-</sup>     | 0                  | 0.558                | 0.2                 | 1.68                             |
| Cl <sup>-</sup>                   | 12.5               | 1.15                 | 0.6                 | 9.35                             |
| PO <sub>4</sub> <sup>3-</sup>     | 0                  | 0                    | 0.0128              | 0.069                            |
| <b>Ionic Strength<sup>a</sup></b> | 12.5               | 13.2                 | 6.6                 | 25.6                             |
| <b>TIC (mM)</b>                   | 0                  | 2.42                 | 3.89                | 5.00                             |
| <b>DOC (mg/L)</b>                 | 0                  | 1.55                 | 0                   | 4.91                             |

175 <sup>a</sup>Carbonate contribution to ionic strength calculated using speciation the speciation of TIC at the initial pH of the  
 176 waters. <sup>b</sup>Nitrified wastewater effluent was obtained from the Discovery Bay municipal wastewater treatment  
 177 plant (Discovery Bay, CA).

178 Electrolyte, simulated surface water, and simulated groundwater were prepared in 18 MΩ  
 179 Milli-Q water. Un-disinfected, nitrified wastewater effluent from the adjacent oxidation ditch  
 180 treatment plant was obtained from the Discovery Bay municipal wastewater treatment plant  
 181 (Discovery Bay, CA).

182 Trace organic compounds were separated by an Agilent 1200 HPLC using a 3.0 mm ×  
 183 150 mm Phenomenex Synergi Hydro-RP 4 μm column, after a 3.00 mm × 4 mm AQ C18  
 184 SecurityGuard guard cartridge. The column was eluted with 0.6 mL min<sup>-1</sup> methanol and 0.1%  
 185 acetic acid in water with the following gradient: 0 minutes, 0% methanol; 2 minutes, 0%  
 186 methanol; 8 minutes, 60% methanol; 11 minutes, 95% methanol; 12 minutes, 95% methanol;  
 187 12.1 minutes, 0% methanol; 17 minutes, 0% methanol. Compounds were detected with an  
 188 Agilent 6460 MS-MS using electrospray ionization (ESI) with a gas temperature of 350°C, a  
 189 sheath gas temperature of 400°C, a gas flow rate of 11 L/min at 50 psi, and a capillary voltage  
 190 of 3600 V. Compound-specific parameters are given in Table SI 2.

191

192

193 **Table S2.** Compound-Specific Mass Spectrometry Parameters<sup>a</sup>

| compound          | precursor ion<br>(amu) | fragmentor voltage<br>(V) | product ions<br>(amu) | collision energy<br>(V) | cell accelerator<br>(V) | ionization mode       |
|-------------------|------------------------|---------------------------|-----------------------|-------------------------|-------------------------|-----------------------|
| Atenolol          | 267                    | 130                       | 145                   | 24                      | 7                       | positive <sup>b</sup> |
|                   |                        |                           | 190                   | 16                      |                         |                       |
| Atrazine          | 216.1                  | 100                       | 173.9                 | 30                      | 3                       | positive              |
|                   |                        |                           | 104                   | 15                      | 3                       |                       |
| Carbamazepine     | 237                    | 120                       | 179                   | 35                      | 7                       | positive              |
|                   |                        |                           | 194                   | 15                      |                         |                       |
| Gemfibrozil       | 249                    | 75                        | 121                   | 5                       | 3                       | negative <sup>c</sup> |
| Ibuprofen         | 205                    | 50                        | 161                   | 0                       | 3                       | negative              |
| Metoprolol        | 268                    | 130                       | 159                   | 17                      | 7                       | positive              |
|                   |                        |                           | 116                   | 14                      |                         |                       |
| Propranolol       | 260                    | 98                        | 116                   | 13                      | 7                       | positive              |
|                   |                        |                           | 183                   | 12                      |                         |                       |
| Sulfa-methoxazole | 254                    | 110                       | 92                    | 25                      | 7                       | positive              |
|                   |                        |                           | 156                   | 10                      |                         |                       |
| Trimethoprim      | 291                    | 140                       | 123                   | 20                      | 7                       | positive              |
|                   |                        |                           | 261                   | 17                      |                         |                       |

194 <sup>a</sup>All compounds were analyzed using a drying gas temperature of 350 ° C, a gas flow of 12 L min<sup>-1</sup>, a nebulizer  
195 pressure of 60 psi, a sheath gas temperature of 400 ° C, a sheath gas flow of 12 L min<sup>-1</sup>, a nozzle voltage of  
196 300 V, and a dwell time of 7 ms. <sup>b</sup>Compounds analyzed by positive ionization used a capillary voltage of  
197 3600 V. <sup>c</sup>Compounds analyzed by negative ionization used a capillary voltage of 4500 V.

198

199



200 **Table S3.** Compound Specific Properties

| Compound         | Property                                           |                                            |                 |                     |                                           |                                                        |                                            |
|------------------|----------------------------------------------------|--------------------------------------------|-----------------|---------------------|-------------------------------------------|--------------------------------------------------------|--------------------------------------------|
|                  | $\epsilon_{254}$ ( $M^{-1} cm^{-1}$ ) <sup>4</sup> | $\Phi_{254}$ (mol $Ei^{-1}$ ) <sup>4</sup> | pK <sub>a</sub> | log K <sub>ow</sub> | k <sub>HO•,cont</sub> ( $M^{-1} s^{-1}$ ) | k <sub>CO<sub>3</sub>•-,cont</sub> ( $M^{-1} s^{-1}$ ) | k <sub>HOCl,cont</sub> ( $M^{-1} s^{-1}$ ) |
| Atenolol         | $5.27 \times 10^2$                                 | $1.1 \times 10^{-2}$                       | 9.6             | 0.2-0.5             | $7.5 \times 10^9$ <sup>(5)</sup>          | $5.9 \times 10^7$ <sup>(6)</sup>                       | $1.7 \times 10^{-2}$ <sup>(7)</sup>        |
| Trimethoprim     | $2.64 \times 10^3$                                 | $1.49 \times 10^{-3}$                      | 9.5             | 1.9-2.3             | $8.7 \times 10^9$ <sup>(8)</sup>          | $3.5 \times 10^7$ <sup>(6, 9)</sup>                    | $1.6 \times 10^2$ <sup>(10)</sup>          |
| Metoprolol       | $1.9 \times 10^2$                                  | $1.18 \times 10^{-2}$                      | 9.1             | 3.4                 | $8.4 \times 10^9$ <sup>(6)</sup>          | -                                                      | $1.7 \times 10^{-2}$ <sup>(7)</sup>        |
| Sulfamethoxazole | $6.92 \times 10^3$                                 | $9.0 \times 10^{-2}$                       | 7.4             | 0.9                 | $5.9 \times 10^9$ <sup>(6)</sup>          | $4.4 \times 10^8$ <sup>(6)</sup>                       | $6.17 \times 10^2$ <sup>(10)</sup>         |
| Propranolol      | $1.03 \times 10^3$                                 | $5.2 \times 10^{-3}$                       | 5.6             | 0.9                 | $1.1 \times 10^{10}$ <sup>(6)</sup>       | $4.6 \times 10^8$ <sup>(6)</sup>                       | $7.5 \times 10^0$ <sup>(7)</sup>           |
| Carbamazepine    | $5.27 \times 10^2$                                 | $1.3 \times 10^{-4}$                       | 13.9            | 2.5                 | $9.1 \times 10^9$ <sup>(6)</sup>          | $2.3 \times 10^6$ <sup>(6)</sup>                       | < 0.1 <sup>(11)</sup>                      |
| Atrazine         | $3.86 \times 10^3$                                 | $4.6 \times 10^{-2}$                       | 3.2             | 2.7                 | $3 \times 10^9$ <sup>(12)</sup>           | -                                                      | -                                          |
| Ibuprofen        | $1.24 \times 10^3$                                 | $1.12 \times 10^{-2}$                      | 4.91            | 2.5                 | $6.7 \times 10^9$ <sup>(13)</sup>         | -                                                      | < 0.1 <sup>(11)</sup>                      |
| Gemfibrozil      | n.d.                                               | $1.23 \times 10^{-2}$                      | 4.77            | 4.8                 | $1.0 \times 10^{10}$ <sup>(14)</sup>      | -                                                      | $7.3 \times 10^{-1}$ <sup>(7)</sup>        |

201

202

203

204

205

206

207

208

209

210

211 **Table S4.** Normalized Total System Pharmaceutical Transformation for Electrolyte

|              | Atenolol      | Trimethoprim  | Metoprolol    | Sulfamethoxazole | Propranolol   | Carbamazepine | Atrazine       | Ibuprofen     | TCC           | Gemfibrozil   |
|--------------|---------------|---------------|---------------|------------------|---------------|---------------|----------------|---------------|---------------|---------------|
| No EC/ NO UV | 1.00 ± 0      | 1.00 ± 0      | 1.00 ± 0      | 1.00 ± 0         | 1.00 ± 0      | 1.00 ± 0      | 1.00 ± 0       | 1.00 ± 0      | 1.00 ± 0      | 1.00 ± 0      |
| 0 + UV       | 0.758 ± 0.027 | 0.689 ± 0.030 | 0.684 ± 0.015 | 0.000            | 0.447 ± 0.023 | 0.724 ± 0.053 | 0.162 ± 0.013  | 0.630 ± 0.057 | 0.383 ± 0.060 | 0.782 ± 0.060 |
| 5+ UV        | 0.00          | 0.000         | 0.014 ± 0.010 | 0.000            | 0.006 ± 0.002 | 0.000         | 0.06 ± 0.008   | 0.033 ± 0.007 | 0.328 ± 0.085 | 0.018 ± 0.010 |
| 10 + UV      | 0.00          | 0.000         | 0.004 ± 0.006 | 0.000            | 0.003 ± 0.002 | 0.000         | 0.0531 ± 0.009 | 0.017 ± 0.017 | 0.678 ± 0.359 | 0.000         |
| 15+ UV       | 0.00          | 0.000         | 0.00 ± 0.001  | 0.000            | 0.003 ± 0.002 | 0.000         | 0.052 ± 0.007  | 0.022 ± 0.014 | 0.439 ± 0.190 | 0.000         |
| 20+ UV       | 0.00          | 0.000         | 0.000         | 0.000            | 0.001 ± 0.001 | 0.000         | 0.058 ± 0.002  | 0.018 ± 0.011 | 0.449 ± 0.288 | 0.000         |
| 25+UV        | 0.00          | 0.000         | 0.001 ± 0.002 | 0.000            | 0.000         | 0.000         | 0.068 ± 0.007  | 0.027 ± 0.005 | 0.319 ± 0.143 | 0.000         |

212

213 **Table S5.** Normalized Total System Pharmaceutical Transformation for Synthetic Groundwater

|              | Atenolol       | Trimethoprim   | Metoprolol    | Sulfamethoxazole | Propranolol   | Carbamazepine | Atrazine      | Ibuprofen     | TCC           | Gemfibrozil   |
|--------------|----------------|----------------|---------------|------------------|---------------|---------------|---------------|---------------|---------------|---------------|
| No EC/ NO UV | 1.00 ± 0       | 1.00 ± 0       | 1.00 ± 0      | 1.00 ± 0         | 1.00 ± 0      | 1.00 ± 0      | 1.00 ± 0      | 1.00 ± 0      | 1.00 ± 0      | 1.00 ± 0      |
| 0 + UV       | 0.829 ± 0.030  | 0.622 ± 0.016  | 0.734 ± 0.020 | 0.016 ± 0        | 0.011 ± 0.012 | 0.838 ± 0.012 | 0.180 ± 0.001 | 0.676 ± 0.03  | 0.226 ± 0.127 | 0.725 ± 0.035 |
| 5+ UV        | 0.153 ± 0.013  | 0.0131 ± 0.005 | 0.125 ± 0.006 | 0                | 0.0018 ± 0    | 0.215 ± 0.012 | 0.104 ± 0.004 | 0.265 ± 0.015 | 0.288 ± 0.099 | 0.212 ± 0.01  |
| 10 + UV      | 0.066 ± 0.01   | 0.0064 ± 0.007 | 0.071 ± 0.01  | 0                | 0.0035 ± 0    | 0.118 ± 0.014 | 0.098 ± 0.014 | 0.151 ± 0.032 | 0.394 ± 0.218 | 0.155 ± 0.02  |
| 15+ UV       | 0.041 ± 0      | 0              | 0.032 ± 0.028 | 0                | 0.0017 ± 0    | 0.07 ± 0      | 0.090 ± 0.002 | 0.133 ± 0.009 | 0.3 ± 0.064   | 0.118 ± 0     |
| 20+ UV       | 0.0175 ± 0.003 | 0              | 0.032 ± 0.001 | 0                | 0.0055 ± 0    | 0.047 ± 0.04  | 0.082 ± 0.004 | 0.133 ± 0.01  | 0.241 ± 0.08  | 0.093 ± 0.005 |
| 25+UV        | 0.009 ± 0.003  | 0              | 0.025 ± 0.002 | 0                | 0.002 ± 0     | 0.013 ± 0.01  | 0.077 ± 0.002 | 0.089 ± 0.03  | 0.333 ± 0.118 | 0.081 ± 0.002 |

214

215

216

217

218

219 **Table S6.** Normalized Total System Pharmaceutical Transformation for Wastewater Effluent

|              | Atenolol      | Trimethoprim  | Metoprolol    | Sulfamethoxazole | Propranolol   | Carbamazepine | Atrazine      | Ibuprofen     | TCC           | Gemfibrozil   |
|--------------|---------------|---------------|---------------|------------------|---------------|---------------|---------------|---------------|---------------|---------------|
| No EC/ NO UV | 1.00 ± 0      | 1.00 ± 0      | 1.00 ± 0      | 1.00 ± 0         | 1.00 ± 0      | 1.00 ± 0      | 1.00 ± 0      | 1.00 ± 0      | 1.00 ± 0      | 1.00 ± 0      |
| 0 + UV       | 0.871 ± 0.033 | 0.866 ± 0.015 | 0.831 ± 0.029 | 0.042 ± 0.002    | 0.585 ± 0.013 | 0.858 ± 0.022 | 0.316 ± 0.010 | 0.725 ± 0.040 | 0.386 ± 0.123 | 0.882 ± 0.023 |
| 5+ UV        | 0.577 ± 0.083 | 0.553 ± 0.083 | 0.523 ± 0.071 | 0.022 ± 0.006    | 0.195 ± 0.028 | 0.485 ± 0.049 | 0.264 ± 0.01  | 0.501 ± 0.071 | 0.285 ± 0.067 | 0.559 ± 0.068 |
| 10 + UV      | 0.443 ± 0.018 | 0.429 ± 0.025 | 0.382 ± 0.029 | 0.010 ± 0.01     | 0.090 ± 0.011 | 0.331 ± 0.025 | 0.250 ± 0.024 | 0.429 ± 0.093 | 0.241 ± 0.052 | 0.441 ± 0.073 |
| 15+ UV       | 0.400 ± 0.051 | 0.390 ± 0.042 | 0.331 ± 0.047 | 0.005 ± 0.004    | 0.055 ± 0.007 | 0.271 ± 0.029 | 0.239 ± 0.015 | 0.374 ± 0.071 | 0.463 ± 0.131 | 0.366 ± 0.041 |
| 20+ UV       | 0.378 ± 0.060 | 0.359 ± 0.061 | 0.313 ± 0.055 | 0.013 ± 0.002    | 0.051 ± 0.008 | 0.260 ± 0.057 | 0.289 ± 0.021 | 0.228 ± 0.144 | 0.349 ± 0.246 | 0.209 ± 0.189 |
| 25+UV        | 0.324 ± 0.039 | 0.313 ± 0.036 | 0.265 ± 0.025 | 0.009 ± 0        | 0.032 ± 0.006 | 0.215 ± 0.019 | 0.278 ± 0.011 | 0.234 ± 0.133 | 0.515 ± 0.221 | 0.179 ± 0.144 |

220

221 **Table S7.** Normalized Total System Pharmaceutical Transformation for Surface Water

|              | Atenolol      | Trimethoprim  | Metoprolol    | Sulfamethoxazole | Propranolol   | Carbamazepine | Atrazine       | Ibuprofen      | TCC           | Gemfibrozil   |
|--------------|---------------|---------------|---------------|------------------|---------------|---------------|----------------|----------------|---------------|---------------|
| No EC/ NO UV | 1.00 ± 0      | 1.00 ± 0      | 1.00 ± 0      | 1.00 ± 0         | 1.00 ± 0      | 1.00 ± 0      | 1.00 ± 0       | 1.00 ± 0       | 1.00 ± 0      | 1.00 ± 0      |
| 0 + UV       | 0.706 ± 0.12  | 0.737 ± 0.06  | 0.632 ± 0.10  | 0.063 ± 0.014    | 0.414 ± 0.06  | 0.781 ± 0.050 | 0.320 ± 0.024  | 0.762 ± 0.1    | 0.463 ± 0.123 | 0.792 ± 0.13  |
| 5+ UV        | 0.181 ± 0.033 | 0.156 ± 0.006 | 0.155 ± 0.029 | 0.024 ± 0.002    | 0.065 ± 0.014 | 0.160 ± 0.012 | 0.193 ± 0.016  | 0.172 ± 0.0166 | 0.205 ± 0.095 | 0.043 ± 0.006 |
| 10 + UV      | 0.081 ± 0.016 | 0.086 ± 0.008 | 0.065 ± 0.017 | 0.015 ± 0.004    | 0.036 ± 0.087 | 0.080 ± 0.010 | 0.148 ± 0.012  | 0.134 ± 0.027  | 0.406 ± 0.194 | 0.117 ± 0.033 |
| 15+ UV       | 0.074 ± 0.004 | 0.072 ± 0.003 | 0.068 ± 0.003 | 0.012 ± 0.001    | 0.048 ± 0.007 | 0.074 ± 0.005 | 0.144 ± 0.005  | 0.084 ± 0.030  | 0.465 ± 0.35  | 0.071 ± 0.022 |
| 20+ UV       | 0.076 ± 0.024 | 0.087 ± 0.021 | 0.063 ± 0.02  | 0.020 ± 0.007    | 0.043 ± 0.012 | 0.065 ± 0.000 | 0.190 ± 0.0276 | 0.193 ± 0.073  | 0.368 ± 0.154 | 0.157 ± 0.064 |
| 25+UV        | 0.068 ± 0.013 | 0.070 ± 0.017 | 0.058 ± 0.017 | 0.010 ± 0.005    | 0.040 ± 0.012 | 0.067 ± 0.01  | 0.152 ± 0.020  | 0.166 ± 0.034  | 0.251 ± 0.013 | 0.113 ± 0.024 |

222

## 223 REFERENCES

- 224 1. Canonica, S.; Meunier, L.; Von Gunten, U., Phototransformation of selected  
225 pharmaceuticals during UV treatment of drinking water. *Water Research* **2008**, *42*, (1-2), 121-  
226 128.
- 227 2. Zhai, H.; Zhang, X.; Zhu, X.; Liu, J.; Ji, M., Formation of Brominated Disinfection  
228 Byproducts during Chloramination of Drinking Water: New Polar Species and Overall  
229 Kinetics. *Environmental Science & Technology* **2014**, *48*, (5), 2579-2588.
- 230 3. Appiani, E.; Page, S. E.; McNeill, K., On the Use of Hydroxyl Radical Kinetics to  
231 Assess the Number-Average Molecular Weight of Dissolved Organic Matter. *Environmental*  
232 *Science & Technology* **2014**, *48*, (20), 11794-11802.
- 233 4. Jasper, J. T.; Jones, Z. L.; Sharp, J. O.; Sedlak, D. L., Biotransformation of trace  
234 organic contaminants in open-water unit process treatment wetlands. *Environmental Science*  
235 *& Technology* **2014**, *48*, (9), 5136-5144.
- 236 5. Salgado, R.; Pereira, V. J.; Carvalho, G.; Soeiro, R.; Gaffney, V.; Almeida, C.;  
237 Cardoso, V. V.; Ferreira, E.; Benoliel, M. J.; Ternes, T. A.; Oehmen, A.; Reis, M. A. M.;  
238 Noronha, J. P., Photodegradation kinetics and transformation products of ketoprofen,  
239 diclofenac and atenolol in pure water and treated wastewater. *Journal of Hazardous Materials*  
240 **2013**, *244*, 516-527.
- 241 6. Jasper, J. T.; Sedlak, D. L., Phototransformation of Wastewater-Derived Trace  
242 Organic Contaminants in Open-Water Unit Process Treatment Wetlands. *Environmental*  
243 *Science & Technology* **2013**, *47*, (19), 10781-10790.
- 244 7. Pinkston, K. E.; Sedlak, D. L., Transformation of aromatic ether-and amine-containing  
245 pharmaceuticals during chlorine disinfection. *Environmental Science & Technology* **2004**, *38*,  
246 (14), 4019-4025.
- 247 8. Baeza, C.; Knappe, D. R. U., Transformation kinetics of biochemically active  
248 compounds in low-pressure UV Photolysis and UV/H<sub>2</sub>O<sub>2</sub> advanced oxidation processes.  
249 *Water Research* **2011**, *45*, (15), 4531-4543.
- 250 9. Zhang, R.; Sun, P.; Boyer, T. H.; Zhao, L.; Huang, C.-H., Degradation of  
251 Pharmaceuticals and Metabolite in Synthetic Human Urine by UV, UV/H<sub>2</sub>O<sub>2</sub>, and UV/PDS.  
252 *Environmental Science & Technology* **2015**, *49*, (5), 3056-3066.
- 253 10. Deborde, M.; von Gunten, U., Reactions of chlorine with inorganic and organic  
254 compounds during water treatment - Kinetics and mechanisms: A critical review. *Water*  
255 *Research* **2008**, *42*, (1-2), 13-51.
- 256 11. Lee, Y.; von Gunten, U., Oxidative transformation of micropollutants during  
257 municipal wastewater treatment: Comparison of kinetic aspects of selective (chlorine, chlorine  
258 dioxide, ferrate(VI), and ozone) and non-selective oxidants (hydroxyl radical). *Water*  
259 *Research* **2010**, *44*, (2), 555-566.
- 260 12. Acero, J. L.; Stemmler, K.; Von Gunten, U., Degradation kinetics of atrazine and its  
261 degradation products with ozone and OH radicals: A predictive tool for drinking water  
262 treatment. *Environmental Science & Technology* **2000**, *34*, (4), 591-597.
- 263 13. Shu, Z. Q.; Bolton, J. R.; Belosevic, M.; El Din, M. G., Photodegradation of emerging  
264 micropollutants using the medium-pressure UV/H<sub>2</sub>O<sub>2</sub> Advanced Oxidation Process. *Water*  
265 *Research* **2013**, *47*, (8), 2881-2889.
- 266 14. Razavi, B.; Song, W. H.; Cooper, W. J.; Greaves, J.; Jeong, J., Free-Radical-Induced  
267 Oxidative and Reductive Degradation of Fibrate Pharmaceuticals: Kinetic Studies and  
268 Degradation Mechanisms. *Journal of Physical Chemistry A* **2009**, *113*, (7), 1287-1294.

269
